# Supplementary material for: NIR-II imaging-guided photothermal cancer therapy combined with enhanced immunogenic death
Source: Royal Society of Chemistry journal article supplement (doi:10.1039/d3bm00700f), 2023-01-01
Supplement: d3bm00700f1.pdf [file d3bm00700f1.pdf]

**NIR-II imaging-guided photothermal cancer therapy combined with enhanced immunogenic death**

Yukun Wang,<sup>a,\$</sup> Wenjing Li,<sup>a,\$</sup> Bi Lin,<sup>a</sup> Ying Yuan,<sup>b,\*</sup> Pengbo Ning,<sup>a,\*</sup> Xiaofeng Tao,<sup>b,\*</sup> Ruichan Lv<sup>a,c,\*</sup>

<sup>a</sup> Engineering Research Center of Molecular and Neuro Imaging, Ministry of Education, School of Life Science and Technology, Xidian University, Xi'an, Shanxi 710071, China. Email: [pbning@xidian.edu.cn](mailto:pbning@xidian.edu.cn); [rclv@xidian.edu.cn](mailto:rclv@xidian.edu.cn)

<sup>b</sup> Department of Medical Interdisciplinary Research, Xi'an Ninth Hospital Affiliated to Medical College of Xi'an Jiaotong University, 710054, Xi'an, Shaanxi, China. Email: [yuany83@163.com](mailto:yuany83@163.com); [cjr.taoxiaofeng@vip.163.com](mailto:cjr.taoxiaofeng@vip.163.com)

<sup>c</sup> Interdisciplinary Research Center of Smart Sensor, Xi'an Key Laboratory of Intelligent Sensing and Regulation of trans-Scale Life Information, Xidian University, Xi'an, Shaanxi 710126, P. R. China.

### Calculation of the photothermal conversion efficiency.

The photothermal conversion efficiency ( $\eta$ ) of GdOF@PDA is calculated by the following formula.

$$\sum_i m_i C_{p,i} \frac{dT}{dt} = Q_{NC} + Q_{Dis} - Q_{Surr} \quad (1)$$

where  $m$  and  $C_p$  are the mass and heat capacity of water, respectively,  $T$  is the solution temperature,  $Q_{NC}$  is the energy inputted by NCs,  $Q_{Dis}$  is the energy inputted by the cuvette, and  $Q_{Surr}$  is the heat exchanged between the air and the system.

$$Q_{NC} = I(1 - 10^{-A_{980}})\eta \quad (2)$$

where  $I$  is laser power,  $\eta$  is the photothermal conversion efficiency, and  $A_{980}$  is the absorbance of the sample at wavelength of 980 nm.

$$Q_{Surr} = hS(T - T_{Surr}) \quad (3)$$

where  $h$  is heat transfer coefficient,  $S$  is the surface area of the container, and  $T_{Surr}$  is the ambient temperature.

$$Q_{NC} + Q_{Dis} = Q_{Surr-Max} = hS(T_{Max} - T_{Surr}) \quad (4)$$

Through the formulas (1), (2), (3), and (4) above, the photothermal conversion efficiency is obtained as follows:

$$\eta = \frac{hS(T_{Max} - T_{Surr}) - Q_{Dis}}{I(1 - 10^{-A_{980}})} \quad (5)$$

Observing formula (5), to get the value of light-to-heat conversion efficiency, only the value of  $hS$  needs to be calculated, while other values can be obtained during the experiment. The value of  $hS$  can be obtained through the following formulas:

$$\theta = \frac{T - T_{Surr}}{T_{Max} - T_{Surr}} \quad (6)$$

$$\tau_s = \frac{\sum_i m_i C_{p,i}}{hS} \quad (7)$$

$$\frac{d\theta}{dt} = \frac{1}{\tau_s} \left[ \frac{Q_{NC} + Q_{Dis}}{hS(T_{Max} - T_{Surr})} - \theta \right] \quad (8)$$

$$dt = \tau_s \frac{d\theta}{\theta} \quad (9)$$

$$t = -\tau_s \ln \theta \quad (10)$$

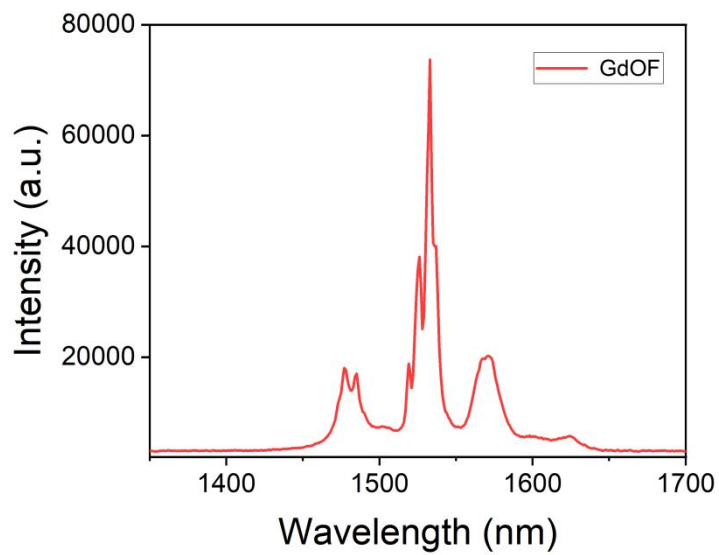

**Figure S1.** NIR-II spectrum of GdOF (doping with Yb,Er).

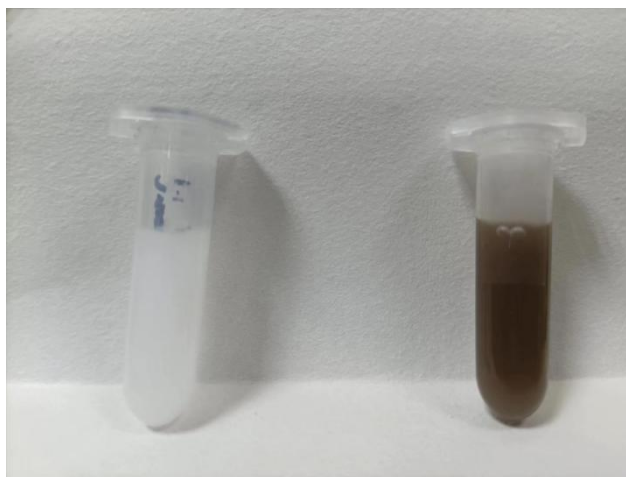

**Figure S2.** Solution color changes during the synthesis process of GdOF@PDA NPs.

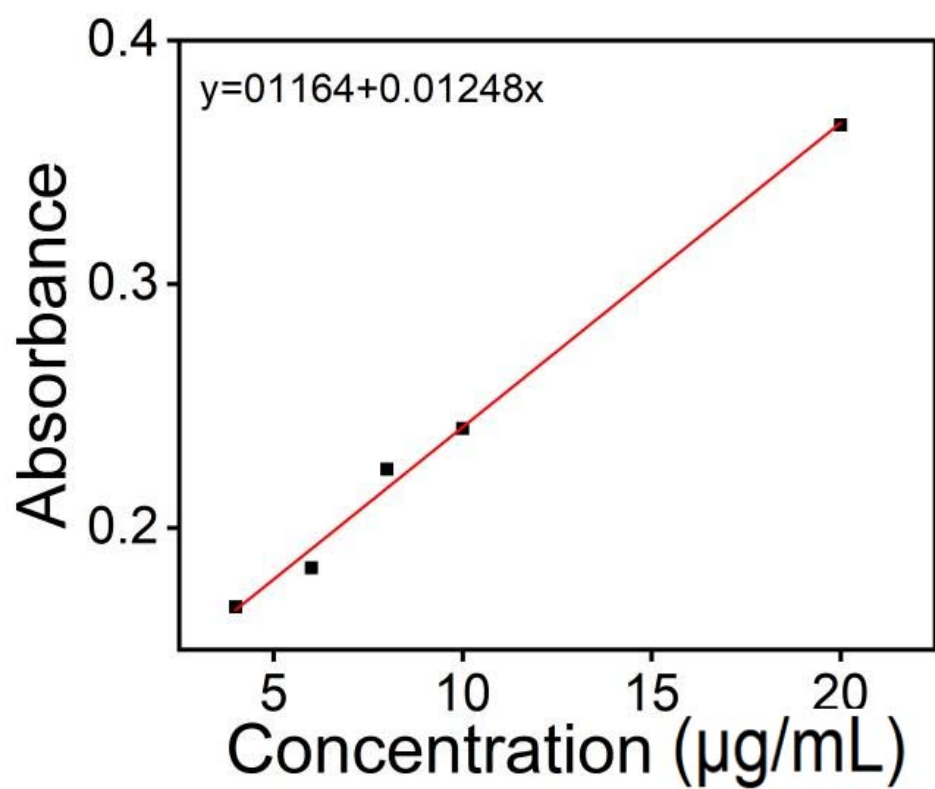

**Figure S3.** Standard curve of R837 in DMSO.

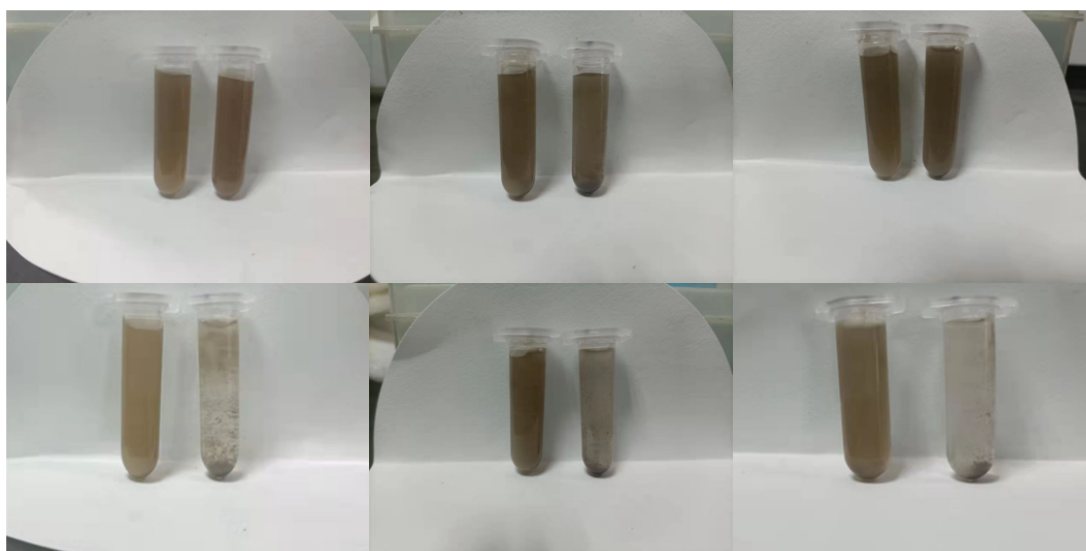

**Figure S4.** Nanoparticles aqueous solution changes during drug release in acidic conditions.

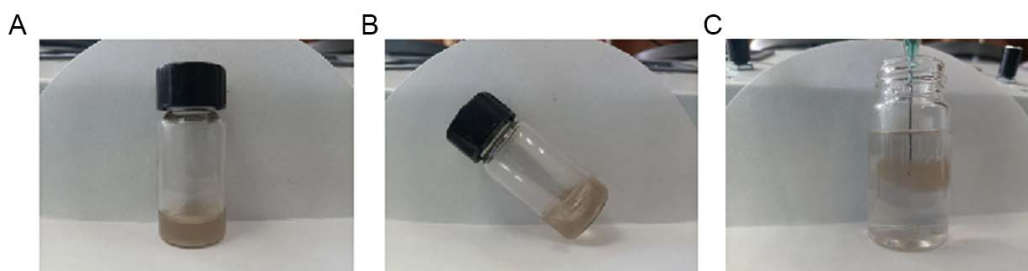

**Figure S5.** The gel phenomenon of nanoparticles in calcium ion environment. A) GdOF @ PDA-HA-R837 HG was mixed with  $\text{Ca}^{2+}$  solution. B) The mixed solution of A) was tilted and shown a gel formation rather than a liquid. C) GdOF @ PDA-HA-R837 HG was added to  $\text{Ca}^{2+}$  solution, and gel formation appeared immediately.

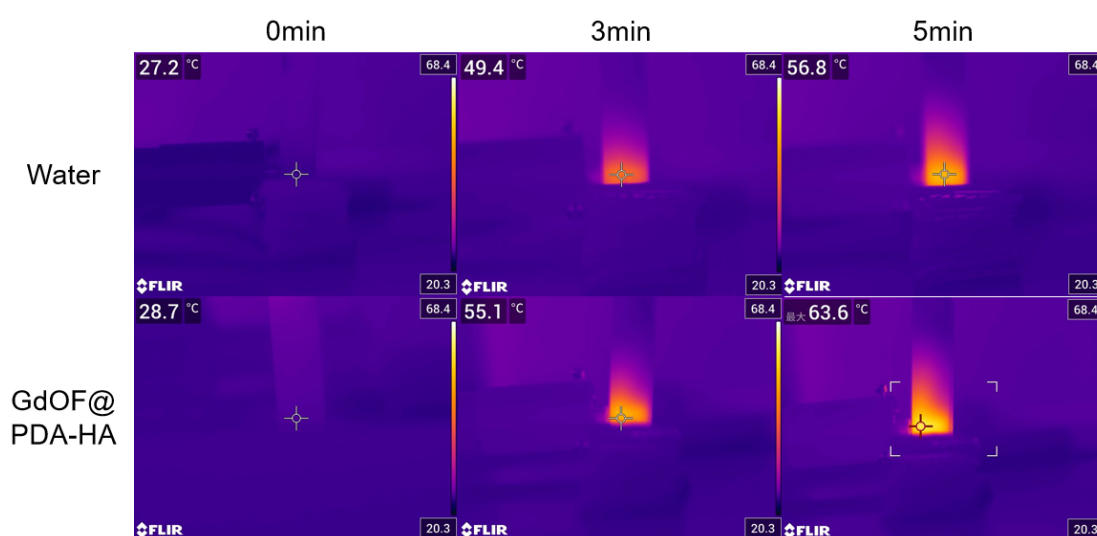

**Figure S6.** Temperature changes in water and GdOF@PDA-HA under laser irradiation (980 nm,  $1.5\text{W}/\text{cm}^2$ ).

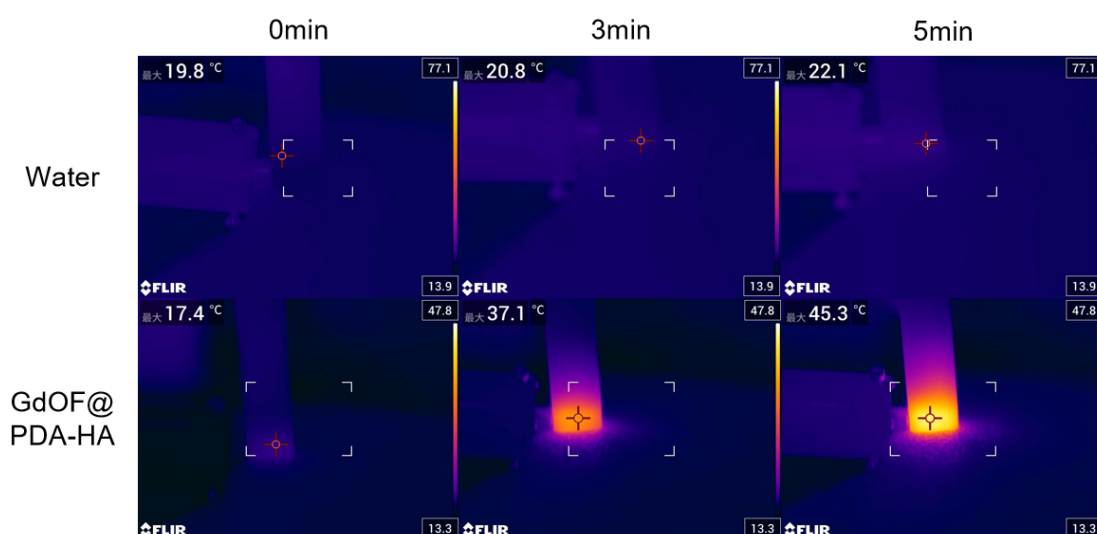

**Figure S7.** Temperature changes in water and GdOF@PDA-HA under laser irradiation (808 nm,  $1.5\text{W}/\text{cm}^2$ ).

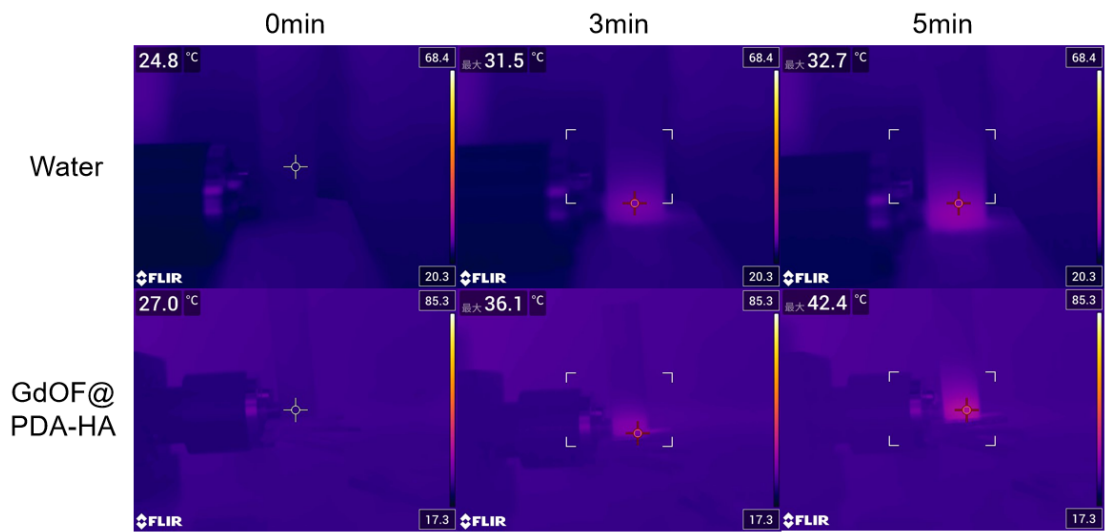

**Figure S8.** Temperature changes in water and GdOF@PDA-HA under laser irradiation (1064 nm, 1.5W/cm<sup>2</sup>).

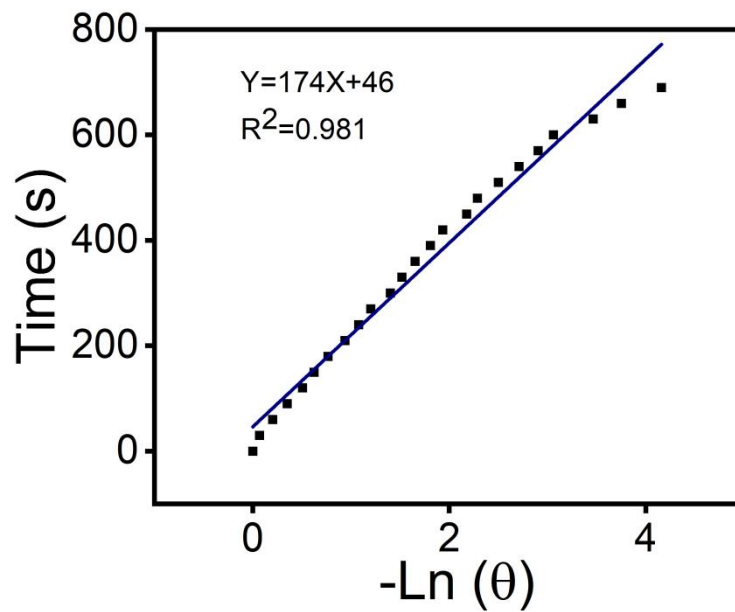

**Figure S9.** Linear time data versus  $-\ln\theta$  obtained from the cooling stage.

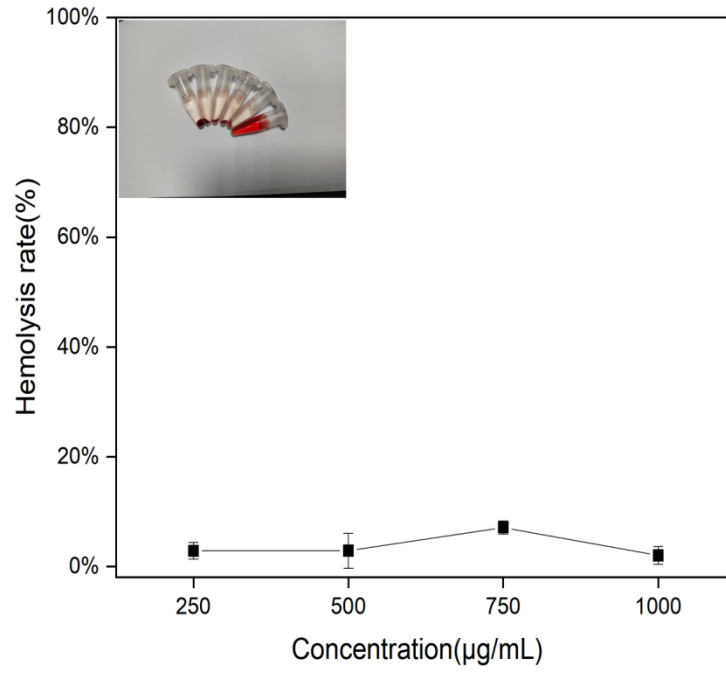

**Figure S10.** The result of the hemolysis experiment. From left to right in the insert figure are PBS, 250 µg/mL, 500 µg/mL, 750 µg/mL, 1000 µg/mL, and ultrapure water.

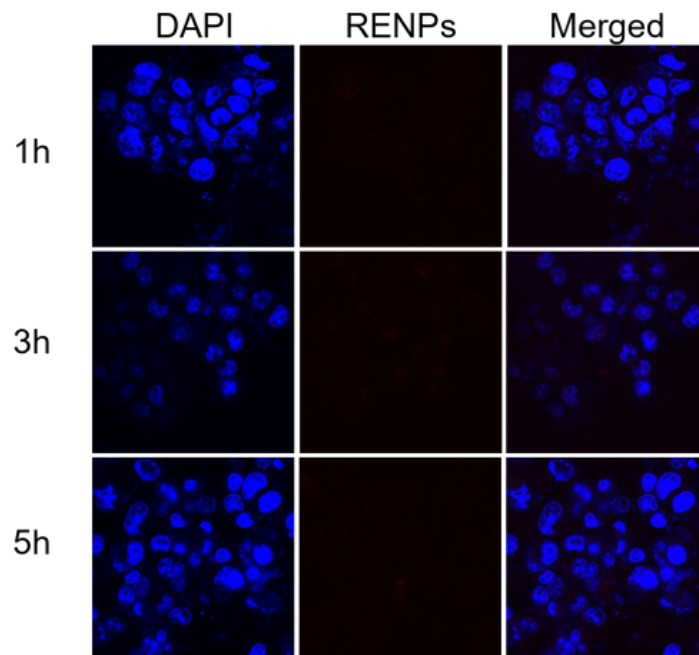

**Figure S11.** Cell uptake of GdOF@PDA.
